# Supplementary material
Source: PubMed Central journal article supplement (PMC9329218)
Supplement: NIHMS1809307-supplement-1.pdf [file NIHMS1809307-supplement-1.pdf]

## **Appendix**

### Supplementary Methods

#### *Plaque Reduction Neutralization Test*

Serum samples were analyzed by Battelle Biomedical Research Center (West Jefferson, OH). Briefly, heat-inactivated sera were serially diluted and incubated with WEEV (wild-type strain Fleming), VEEV (wild-type strain Trinidad Donkey), or EEEV (wild-type strain V105-00210) alphavirus stocks for approximately one hour. The virus-serum mixture was added to confluent monolayers of VERO E6 cells in triplicate and further incubated for approximately one hour after which overlay media was added. After approximately 48 hours of incubation, the overlay media was removed, and the cells were stained with crystal violet and fixed with a formalin solution. Plaques were counted manually and the reciprocal of serum dilutions that neutralize 80% of input virus (PRNT<sub>80</sub> titers) were measured. The average PRNT titers were calculated using STATA<sup>®</sup> software program for each sample tested.

Table 1: Maximum local and systemic solicited reactivity

|                          | 6 mcg        |         | 6 mcg+alum |         | 30 mcg  |         | 30 mcg+alum |         | 60 mcg  |         | 60 mcg+alum |         | Overall<br>(n = 30) |
|--------------------------|--------------|---------|------------|---------|---------|---------|-------------|---------|---------|---------|-------------|---------|---------------------|
|                          | Dose 1       | Dose 2  | Dose 1     | Dose 2  | Dose 1  | Dose 2  | Dose 1      | Dose 2  | Dose 1  | Dose 2  | Dose 1      | Dose 2  |                     |
|                          | (n = 5)      | (n = 4) | (n = 5)    | (n = 5) | (n = 5) | (n = 5) | (n = 5)     | (n = 5) | (n = 5) | (n = 5) | (n = 5)     | (n = 5) |                     |
| <b>Local Symptoms</b>    | <b>n (%)</b> |         |            |         |         |         |             |         |         |         |             |         |                     |
| Pain/<br>Tenderness      |              |         |            |         |         |         |             |         |         |         |             |         |                     |
| None                     | 4 (80)       | 3 (75)  | 4 (80)     | 2 (40)  | 2 (40)  | 0 (0)   | 2 (40)      | 1 (20)  | 1 (20)  | 2 (40)  | 1 (20)      | 1 (20)  | 8 (27)              |
| Mild                     | 1 (20)       | 1 (25)  | 1 (20)     | 3 (60)  | 3 (60)  | 5 (100) | 3 (60)      | 4 (80)  | 4 (80)  | 3 (60)  | 4 (80)      | 4 (80)  | 22 (73)             |
| Swelling                 |              |         |            |         |         |         |             |         |         |         |             |         |                     |
| None                     | 5 (100)      | 4 (100) | 5 (100)    | 5 (100) | 5 (100) | 5 (100) | 5 (100)     | 5 (100) | 5 (100) | 5 (100) | 5 (100)     | 5 (100) | 30 (100)            |
| Redness                  |              |         |            |         |         |         |             |         |         |         |             |         |                     |
| None                     | 5 (100)      | 4 (100) | 5 (100)    | 5 (100) | 5 (100) | 5 (100) | 5 (100)     | 5 (100) | 5 (100) | 5 (100) | 5 (100)     | 5 (100) | 30 (100)            |
| Any                      |              |         |            |         |         |         |             |         |         |         |             |         |                     |
| None                     | 4 (80)       | 3 (70)  | 4 (80)     | 2 (40)  | 2 (40)  | 0 (0)   | 2 (40)      | 1 (20)  | 1 (20)  | 2 (40)  | 1 (20)      | 1 (20)  | 8 (27)              |
| Mild                     | 1 (20)       | 1 (25)  | 1 (20)     | 3 (60)  | 3 (60)  | 5 (100) | 3 (60)      | 4 (80)  | 4 (80)  | 3 (60)  | 4 (80)      | 4 (80)  | 22 (73)             |
| <b>Systemic symptoms</b> | <b>n (%)</b> |         |            |         |         |         |             |         |         |         |             |         |                     |
| Malaise                  |              |         |            |         |         |         |             |         |         |         |             |         |                     |
| None                     | 4 (80)       | 4 (80)  | 4 (80)     | 4 (80)  | 3 (60)  | 3 (60)  | 3 (60)      | 2 (40)  | 3 (60)  | 4 (80)  | 2 (40)      | 2 (40)  | 15 (50)             |
| Mild                     | 1 (20)       | 0 (0)   | 1 (20)     | 1 (20)  | 2 (40)  | 2 (40)  | 2 (40)      | 3 (60)  | 2 (40)  | 1 (20)  | 3 (60)      | 3 (60)  | 15 (50)             |
| Myalgia                  |              |         |            |         |         |         |             |         |         |         |             |         |                     |
| None                     | 5 (100)      | 4 (100) | 4 (80)     | 5 (100) | 4 (80)  | 4 (80)  | 5 (100)     | 3 (60)  | 4 (80)  | 4 (80)  | 3 (60)      | 3 (60)  | 21 (70)             |
| Mild                     | 0 (0)        | 0 (0)   | 1 (20)     | 0 (0)   | 1 (20)  | 1 (20)  | 0 (0)       | 2 (40)  | 1 (20)  | 1 (20)  | 2 (40)      | 2 (40)  | 9 (30)              |
| Headache                 |              |         |            |         |         |         |             |         |         |         |             |         |                     |
| None                     | 4 (80)       | 3 (75)  | 4 (80)     | 4 (80)  | 3 (60)  | 4 (80)  | 3 (60)      | 4 (80)  | 4 (80)  | 5 (100) | 3 (60)      | 4 (80)  | 21 (70)             |
| Mild                     | 1 (20)       | 1 (25)  | 1 (20)     | 1 (20)  | 2 (40)  | 1 (20)  | 1 (20)      | 1 (20)  | 1 (20)  | 0 (0)   | 2 (40)      | 0 (0)   | 7 (23)              |
| Moderate                 | 0 (0)        | 0 (0)   | 0 (0)      | 0 (0)   | 0 (0)   | 0 (0)   | 1 (20)      | 0 (0)   | 0 (0)   | 0 (0)   | 0 (0)       | 1 (20)  | 2 (7)               |
| Chills                   |              |         |            |         |         |         |             |         |         |         |             |         |                     |
| None                     | 5 (100)      | 4 (100) | 4 (80)     | 5 (100) | 5 (100) | 5 (100) | 5 (100)     | 5 (100) | 5 (100) | 5 (100) | 5 (100)     | 5 (100) | 29 (97)             |
| Mild                     | 0 (0)        | 0 (0)   | 1 (20)     | 0 (0)   | 0 (0)   | 0 (0)   | 0 (0)       | 0 (0)   | 0 (0)   | 0 (0)   | 0 (0)       | 0 (0)   | 1 (3)               |
| Nausea                   |              |         |            |         |         |         |             |         |         |         |             |         |                     |
| None                     | 4 (80)       | 4 (100) | 3 (60)     | 5 (100) | 5 (100) | 5 (100) | 5 (100)     | 4 (80)  | 5 (100) | 4 (80)  | 4 (80)      | 4 (80)  | 24 (80)             |

|             |         |         |         |         |         |         |         |         |         |         |         |         |          |
|-------------|---------|---------|---------|---------|---------|---------|---------|---------|---------|---------|---------|---------|----------|
| Mild        | 1 (20)  | 0 (0)   | 2 (40)  | 0 (0)   | 0 (0)   | 0 (0)   | 0 (0)   | 1 (20)  | 0 (0)   | 1 (20)  | 1 (20)  | 1 (20)  | 6 (20)   |
| Temperature |         |         |         |         |         |         |         |         |         |         |         |         |          |
| None        | 5 (100) | 4 (100) | 5 (100) | 5 (100) | 5 (100) | 5 (100) | 5 (100) | 5 (100) | 5 (100) | 5 (100) | 5 (100) | 5 (100) | 30 (100) |
| Joint pain  |         |         |         |         |         |         |         |         |         |         |         |         |          |
| None        | 5 (100) | 4 (100) | 5 (100) | 5 (100) | 4 (80)  | 5 (100) | 4 (80)  | 5 (100) | 5 (100) | 5 (100) | 5 (100) | 4 (80)  | 27 (90)  |
| Mild        | 0 (0)   | 0 (0)   | 0 (0)   | 0 (0)   | 1 (20)  | 0 (0)   | 1 (20)  | 0 (0)   | 0 (0)   | 0 (0)   | 0 (0)   | 1 (20)  | 3 (10)   |
| Any         |         |         |         |         |         |         |         |         |         |         |         |         |          |
| None        | 3 (60)  | 3 (75)  | 3 (60)  | 4 (80)  | 3 (60)  | 3 (60)  | 3 (60)  | 1 (20)  | 2 (40)  | 3 (60)  | 1 (20)  | 2 (40)  | 11 (37)  |
| Mild        | 2 (40)  | 1 (25)  | 2 (40)  | 1 (20)  | 2 (40)  | 2 (40)  | 1 (20)  | 4 (80)  | 3 (60)  | 2 (40)  | 4 (80)  | 2 (40)  | 17 (57)  |
| Moderate    | 0 (0)   | 0 (0)   | 0 (0)   | 0 (0)   | 0 (0)   | 0 (0)   | 1 (20)  | 0 (0)   | 0 (0)   | 0 (0)   | 0 (0)   | 1 (20)  | 2 (7)    |

Table 2: Comparison of the percentage of participants experiencing solicited reactogenicity post either dose

| Symptom         | Statistic | Solicited Reactogenicity by Dose Level      |                                              |                                              |                                            |                                            |                                             | Solicited Reactogenicity by Adjuvant                     |                                                           |                                                                     |
|-----------------|-----------|---------------------------------------------|----------------------------------------------|----------------------------------------------|--------------------------------------------|--------------------------------------------|---------------------------------------------|----------------------------------------------------------|-----------------------------------------------------------|---------------------------------------------------------------------|
|                 |           | 6 mcg WEVEE Alone and WEVEE + Alum (n = 10) | 30 mcg WEVEE Alone and WEVEE + Alum (n = 10) | 60 mcg WEVEE Alone and WEVEE + Alum (n = 10) | Difference between 30 mcg and 6 mcg Groups | Difference between 60 mcg and 6 mcg Groups | Difference between 60 mcg and 30 mcg Groups | All Dose Levels (6, 30, and 60 mcg) WEVEE Alone (n = 15) | All Dose Levels (6, 30, and 60 mcg) WEVEE + Alum (n = 15) | Difference between All Dose Levels + Alum and All Dose Levels Alone |
| Any symptom     | n (%)     | 6 (60)                                      | 10 (100)                                     | 9 (90)                                       | 4 (40)                                     | 3 (30)                                     | -1 (-10)                                    | 11 (73)                                                  | 14 (93)                                                   | 3 (20)                                                              |
|                 | 95% CI    | 26, 88                                      | 69, 100                                      | 55, 100                                      | 10, 70                                     | -6, 66                                     | -29, 9                                      | 45, 92                                                   | 68, 100                                                   | -6, 46                                                              |
| Pain/Tenderness | n (%)     | 4 (40)                                      | 9 (90)                                       | 9 (90)                                       | 5 (50)                                     | 5 (50)                                     | 0 (0)                                       | 10 (67)                                                  | 12 (80)                                                   | 2 (13)                                                              |
|                 | 95% CI    | 12, 74                                      | 55, 100                                      | 55, 100                                      | 14, 86                                     | 14, 86                                     | -26, 26                                     | 38, 88                                                   | 52, 96                                                    | -18, 45                                                             |
| Malaise         | n (%)     | 3 (30)                                      | 6 (60)                                       | 6 (60)                                       | 3 (30)                                     | 3 (30)                                     | 0 (0)                                       | 5 (33)                                                   | 10 (67)                                                   | 5 (33)                                                              |
|                 | 95% CI    | 7, 65                                       | 26, 88                                       | 26, 88                                       | -12, 72                                    | -12, 72                                    | -43, 43                                     | 12, 62                                                   | 38, 88                                                    | 0, 67                                                               |
| Myalgia         | n (%)     | 1 (10)                                      | 3 (30)                                       | 5 (50)                                       | 2 (20)                                     | 4 (40)                                     | 2 (20)                                      | 3 (20)                                                   | 6 (40)                                                    | 3 (20)                                                              |
|                 | 95% CI    | 0, 45                                       | 7, 65                                        | 19, 81                                       | -14, 54                                    | 4, 76                                      | -22, 62                                     | 4, 48                                                    | 16, 68                                                    | -12, 52                                                             |
| Headache        | n (%)     | 2 (20)                                      | 4 (40)                                       | 3 (30)                                       | 2 (20)                                     | 1 (10)                                     | -1 (-10)                                    | 4 (27)                                                   | 5 (33)                                                    | 1 (7)                                                               |
|                 | 95% CI    | 3, 56                                       | 12, 74                                       | 7, 65                                        | -19, 59                                    | -28, 48                                    | -52, 32                                     | 8, 55                                                    | 12, 62                                                    | -26, 39                                                             |
| Chills          | n (%)     | 1 (10)                                      | 0 (0)                                        | 0 (0)                                        | -1 (-10)                                   | -1 (-10)                                   | 0 (0)                                       | 0 (0)                                                    | 1 (7)                                                     | 1 (7)                                                               |
|                 | 95% CI    | 0, 45                                       | 0, 31                                        | 0, 31                                        | -29, 9                                     | -29, 9                                     | NC                                          | 0, 22                                                    | 0, 32                                                     | -6, 19                                                              |
| Nausea          | n (%)     | 3 (30)                                      | 1 (10)                                       | 2 (20)                                       | -2 (-20)                                   | -1 (-10)                                   | 1 (10)                                      | 2 (13)                                                   | 4 (27)                                                    | 2 (13)                                                              |
|                 | 95% CI    | 7, 65                                       | 0, 45                                        | 3, 56                                        | -54, 14                                    | -48, 28                                    | -21, 41                                     | 2, 40                                                    | 8, 55                                                     | -15, 42                                                             |
| Joint pain      | n (%)     | 0 (0)                                       | 2 (20)                                       | 1 (10)                                       | 2 (20)                                     | 1 (10)                                     | -1 (-10)                                    | 1 (7)                                                    | 2 (13)                                                    | 1 (7)                                                               |
|                 | 95% CI    | 0, 31                                       | 3, 56                                        | 0, 45                                        | -5, 45                                     | -9, 29                                     | -41, 21                                     | 0, 32                                                    | 2, 40                                                     | -15, 28                                                             |

NC= Not Calculable

Table 3: Geometric Mean Titers (GMT) of PRNT<sub>80</sub> titers by group and percent positive responders<sup>1</sup>

|                              | <b>Week 0<br/>Baseline</b>         | <b>Week 4<br/>4 weeks post 1<sup>st</sup><br/>vac</b> | <b>Week 10<br/>2 weeks post 2<sup>nd</sup><br/>vac</b> | <b>Week 12<br/>4 weeks post 2<sup>nd</sup><br/>vac</b> | <b>Week 24<br/>16 weeks post<br/>2<sup>nd</sup> vac</b> | <b>Week 36<br/>28 weeks post 2<sup>nd</sup><br/>vac</b> |
|------------------------------|------------------------------------|-------------------------------------------------------|--------------------------------------------------------|--------------------------------------------------------|---------------------------------------------------------|---------------------------------------------------------|
| <b>WEVEE VLP dose</b>        | <i>GMT (95% CI) [% responders]</i> |                                                       |                                                        |                                                        |                                                         |                                                         |
| <b>6 mcg (n = 4)</b>         |                                    |                                                       |                                                        |                                                        |                                                         |                                                         |
| EEEV                         | 5<br>[0%]                          | 6.2 (3.1, 12.5)<br>[25%]                              | 6.9 (2.5, 19.1)<br>[25%]                               | 7.8 (1.9, 31.4)<br>[25%]                               | 5<br>[0%]                                               | 6.5 (2.9, 14.7)<br>[25%]                                |
| VEEV                         | 5<br>[0%]                          | 6.5 (2.9, 14.7)<br>[25%]                              | 9.3 (2.9, 29.6)<br>[50%]                               | 10.9 (4.3, 27.8)<br>[75%]                              | 5<br>[0%]                                               | 6.9 (2.5, 19.1)<br>[25%]                                |
| WEEV                         | 5<br>[0%]                          | 6.8 (2.6, 18.0)<br>[25%]                              | 9.7 (1.2, 79.0)<br>[25%]                               | 17.8 (1.7, 191.0)<br>[50%]                             | 5<br>[0%]                                               | 8.4 (1.6, 44.0)<br>[25%]                                |
| <b>6 mcg + alum (n = 5)</b>  |                                    |                                                       |                                                        |                                                        |                                                         |                                                         |
| EEEV                         | 5<br>[0%]                          | 5<br>[0%]                                             | 33.4 (13.5, 82.5)<br>[100%]                            | 33.0 (9.7, 112.6)<br>[100%]                            | 8.4 (2.0, 35.9)<br>[20%]                                | 8.1 (2.1, 31.4)<br>[20%]                                |
| VEEV                         | 5<br>[0%]                          | 19.0 (6.9, 52.5)<br>[80%]                             | 42.5 (5.9, 305.3)<br>[80%]                             | 23.3 (2.9, 185.0)<br>[60%]                             | 14.7 (2.8, 75.9)<br>[60%]                               | 8.4 (2.9, 24.6)<br>[20%]                                |
| WEEV                         | 5<br>[0%]                          | 5<br>[0%]                                             | 107.1 (38.2,<br>300.4) [100%]                          | 138.5 (42.5,<br>451.3)<br>[100%]                       | 21.6 (6.2, 75.3)<br>[80%]                               | 8.9 (4.2, 19.1)<br>[40%]                                |
| <b>30 mcg (n = 5)</b>        |                                    |                                                       |                                                        |                                                        |                                                         |                                                         |
| EEEV                         | 5<br>[0%]                          | 5<br>[0%]                                             | 62.4 (21.4, 181.9)<br>[100%]                           | 14.4 (5.1, 41.2)<br>[80%]                              | 18.4 (4.1, 82.2)<br>[60%]                               | 20.1 (6.2, 65.0)<br>[80%]                               |
| VEEV                         | 5<br>[0%]                          | 6.3 (3.3, 12.0)<br>[20%]                              | 58.6 (29.0, 118.5)<br>[100%]                           | 49.9 (30.7, 80.9)<br>[100%]                            | 26.2 (15.9, 43.1)<br>[100%]                             | 12.3 (3.9, 39.0)<br>[60%]                               |
| WEEV                         | 5<br>[0%]                          | 8.0 (3.6, 17.6)<br>[40%]                              | 39.1 (6.8, 226.3)<br>[80%]                             | 50.3 (16.8, 150.2)<br>[100%]                           | 15.7 (3.3, 74.0)<br>[60%]                               | 6.9 (2.8, 16.9)<br>[20%]                                |
| <b>30 mcg + alum (n = 5)</b> |                                    |                                                       |                                                        |                                                        |                                                         |                                                         |
| EEEV                         | 5<br>[0%]                          | 5<br>[0%]                                             | 133.4 (73.6,<br>241.5) [100%]                          | 60.8 (29.9, 124.0)<br>[100%]                           | 53.4 (22.4, 127.3)<br>[100%]                            | 32.3 (16.1, 65.0)<br>[100%]                             |
| VEEV                         | 5<br>[0%]                          | 27.4 (17.8, 42.2)<br>[100%]                           | 166.4 (59.2,<br>468.8) [100%]                          | 111.5 (49.8,<br>249.8)<br>[100%]                       | 44.3 (15.6, 126.1)<br>[100%]                            | 16.4 (3.0, 88.8)<br>[60%]                               |
| WEEV                         | 5<br>[0%]                          | 26.1 (6.4, 107.5)<br>[80%]                            | 170.0 (103.8,<br>278.5) [100%]                         | 187.9 (90.0,<br>392.2) [100%]                          | 31.0 (8.2, 116.7)<br>[80%]                              | 13.5 (6.3, 28.5)<br>[80%]                               |

| <b>60 mcg (n = 5)</b>        |           |                              |                               |                               |                              |                             |
|------------------------------|-----------|------------------------------|-------------------------------|-------------------------------|------------------------------|-----------------------------|
| EEEV                         | 5<br>[0%] | 5<br>[0%]                    | 92.9 (37.4, 230.9)<br>[100%]  | 39.6 (19.6, 80.1)<br>[100%]   | 31.8 (5.8, 173.5)<br>[80%]   | 18.3 (3.7, 91.3)<br>[60%]   |
| VEEV                         | 5<br>[0%] | 11.4 (3.7, 35.5)<br>[60%]    | 146.5 (87.4,<br>245.6) [100%] | 110.5 (49.8,<br>245.5) [100%] | 49.8 (28.9, 85.7)<br>[100%]  | 22.6 (12.3, 41.5)<br>[100%] |
| WEEV                         | 5<br>[0%] | 42.4 (31.7, 56.9)<br>[100%]  | 27.8 (5.5, 141.2)<br>[80%]    | 88.2 (37.7, 206.4)<br>[100%]  | 17.3 (4.1, 72.9)<br>[60%]    | 15.1 (4.0, 56.2)<br>[60%]   |
| <b>60 mcg + alum (n = 5)</b> |           |                              |                               |                               |                              |                             |
| EEEV                         | 5<br>[0%] | 5<br>[0%]                    | 82.5 (35.9, 189.2)<br>[100%]  | 24.4 (7.3, 81.3)<br>[80%]     | 50.6 (22.2, 115.0)<br>[100%] | 22.2 (6.0, 82.9)<br>[80%]   |
| VEEV                         | 5<br>[0%] | 40.8 (16.2, 102.6)<br>[100%] | 85.4 (37.2, 195.8)<br>[100%]  | 68.7 (34.8, 135.7)<br>[100%]  | 42.3 (20.0, 89.5)<br>[100%]  | 11.9 (4.0, 35.9)<br>[60%]   |
| WEEV                         | 5<br>[0%] | 18.6 (4.1, 84.4)<br>[60%]    | 24.9 (5.3, 117.4)<br>[80%]    | 93.2 (41.4, 209.6)<br>[100%]  | 51.7 (19.4, 137.9)<br>[100%] | 24.0 (6.5, 88.4)<br>[80%]   |

<sup>1</sup>Positive Responders are defined as responses above the assay limit of detection (PRNT<sub>80</sub> > 10). All pre-vaccination samples were tested negative and below the assay limit of detection; the background titers are shown as 5 (50% of the assay limit of detection) for statistical evaluation purposes. Study vaccinations occurred at week 0 (baseline) and week 8.

Table 4: Positive responders<sup>1</sup> by dose group and vaccine antigen

|                                 | <b>Week 0<br/>Baseline</b>                                      | <b>Week 4<br/>4 weeks post<br/>1<sup>st</sup> vac</b> | <b>Week 10<br/>2 weeks post<br/>2<sup>nd</sup> vac</b> | <b>Week 12<br/>4 weeks post<br/>2<sup>nd</sup> vac</b> | <b>Week 24<br/>16 weeks post<br/>2<sup>nd</sup> vac</b> | <b>Week 36<br/>28 weeks post<br/>2<sup>nd</sup> vac</b> |
|---------------------------------|-----------------------------------------------------------------|-------------------------------------------------------|--------------------------------------------------------|--------------------------------------------------------|---------------------------------------------------------|---------------------------------------------------------|
| <i>N (%)</i>                    |                                                                 |                                                       |                                                        |                                                        |                                                         |                                                         |
| <b>WEVEE VLP dose group</b>     | <b><i>Positive responders to all three vaccine antigens</i></b> |                                                       |                                                        |                                                        |                                                         |                                                         |
| 6 mcg ( <i>n</i> =4)            | 0 (0)                                                           | 0 (0)                                                 | 1 (25)                                                 | 1 (25)                                                 | 0 (0)                                                   | 1 (25)                                                  |
| 6 mcg + alum ( <i>n</i> =5)     | 0 (0)                                                           | 0 (0)                                                 | 4 (80)                                                 | 3 (60)                                                 | 1 (20)                                                  | 1 (20)                                                  |
| 30 mcg ( <i>n</i> =5)           | 0 (0)                                                           | 0 (0)                                                 | 4 (80)                                                 | 4 (80)                                                 | 2 (40)                                                  | 1 (20)                                                  |
| 30 mcg + alum ( <i>n</i> =5)    | 0 (0)                                                           | 0 (0)                                                 | 5 (100)                                                | 5 (100)                                                | 4 (80)                                                  | 2 (40)                                                  |
| 60 mcg ( <i>n</i> =5)           | 0 (0)                                                           | 0 (0)                                                 | 4 (80)                                                 | 5 (100)                                                | 3 (60)                                                  | 2 (40)                                                  |
| 60 mcg + alum ( <i>n</i> =5)    | 0 (0)                                                           | 0 (0)                                                 | 4 (80)                                                 | 4 (80)                                                 | 5 (100)                                                 | 2 (40)                                                  |
| <b>All dose groups combined</b> |                                                                 |                                                       |                                                        |                                                        |                                                         |                                                         |
| EEEV ( <i>n</i> =29)            | 0 (0)                                                           | 1 (3.4)                                               | 26 (89.7)                                              | 24 (82.8)                                              | 18 (62.1)                                               | 18 (62.1)                                               |
| VEEV ( <i>n</i> =29)            | 0 (0)                                                           | 19 (65.5)                                             | 26 (89.7)                                              | 26 (89.7)                                              | 23 (79.3)                                               | 16 (55.2)                                               |
| WEEV ( <i>n</i> =29)            | 0 (0)                                                           | 15 (51.7)                                             | 23 (79.3)                                              | 27 (93.1)                                              | 19 (65.5)                                               | 15 (51.7)                                               |
| All antigens ( <i>n</i> =29)    | 0 (0)                                                           | 0 (0)                                                 | 22 (75.9)                                              | 22 (75.9)                                              | 15 (51.7)                                               | 9 (31)                                                  |

<sup>1</sup>Positive Responders are defined as responses above the assay limit of detection (PRNT<sub>80</sub> > 10) to all three vaccine components. All pre-vaccination samples were tested negative and below the assay limit of detection. Study vaccinations occurred at week 0 (baseline) and week 8.
